# Supplementary material
Source: PubMed Central journal article supplement (PMC9283324)
Supplement: NIHMS1811952-supplement-2.pdf [file NIHMS1811952-supplement-2.pdf]

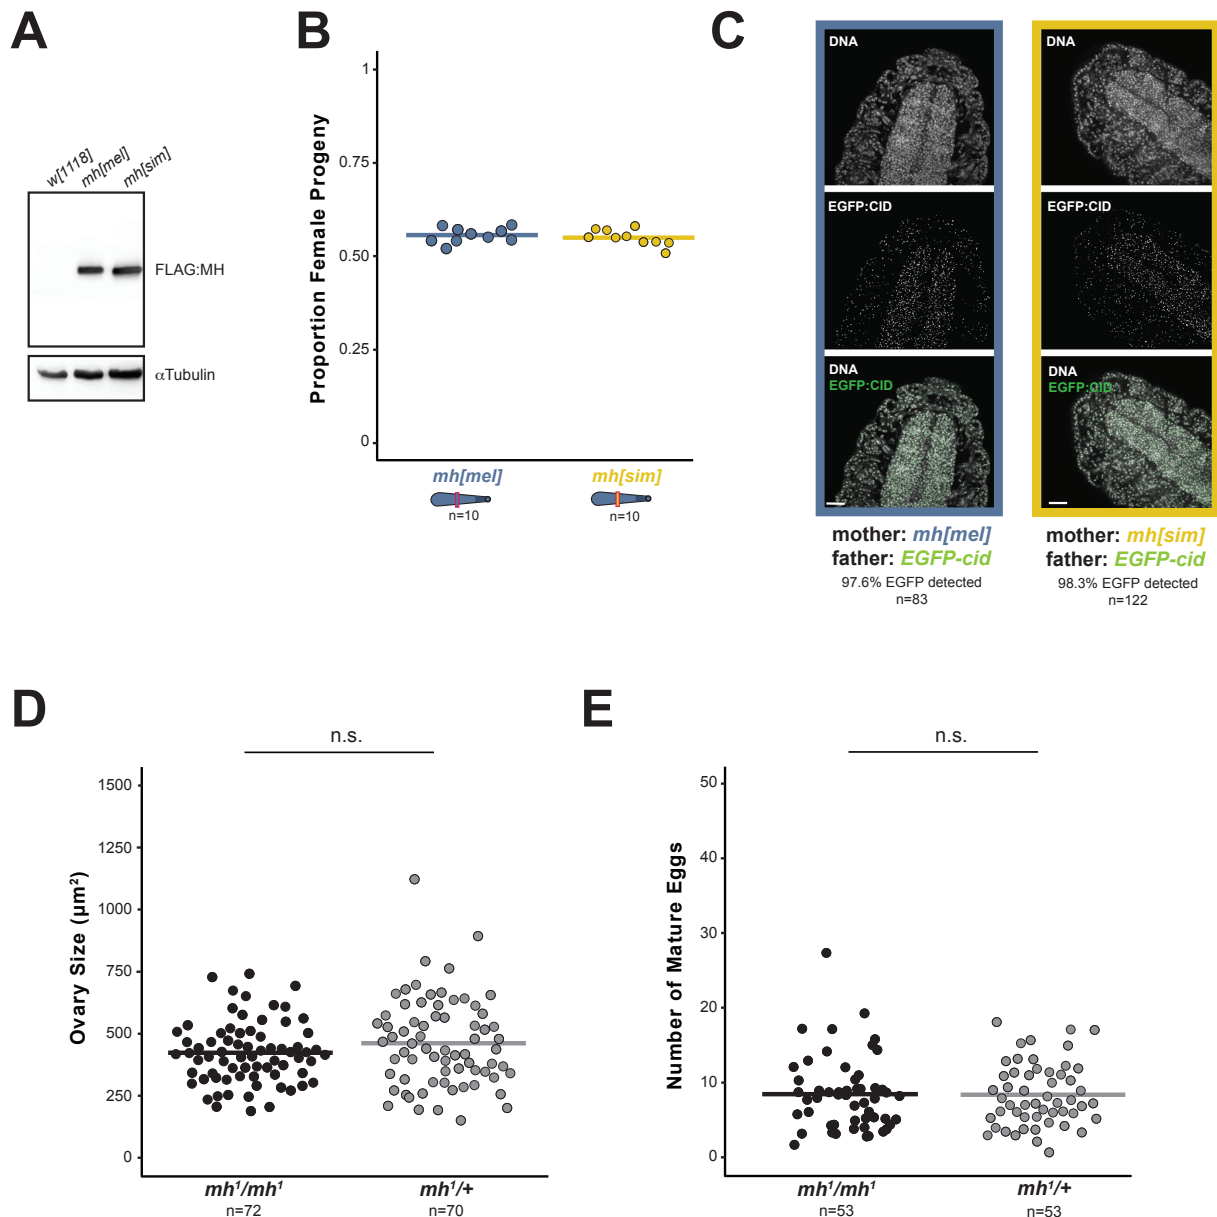

**Figure S1. MH[sim] is expressed at comparable levels to MH[mel] and does not phenocopy *mh* null. Related to Figure 1. (A) Western Blot of *mh[mel]* and *mh[sim]* ovaries probed with anti-FLAG and anti- $\alpha$ Tubulin. (B) Proportion of female progeny from *mh[mel]* and *mh[sim]* mothers. (C) Representative images of diploid embryos from crosses between *EGFP-cid* fathers and *mh[mel]* or *mh[sim]* mothers stained with anti-GFP. Diploid embryos are GFP-positive and haploid embryos are GFP-negative. (D) Ovary size estimates from *mh*<sup>1</sup> homozygous and *mh*<sup>1</sup>/+ heterozygous females. (E) Number of mature eggs per ovary pair from *mh*<sup>1</sup> homozygous and *mh*<sup>1</sup>/+ heterozygous females. (*t*-test: "n.s."  $p > 0.05$ , scale bar = 25 $\mu\text{m}$ )**

**A**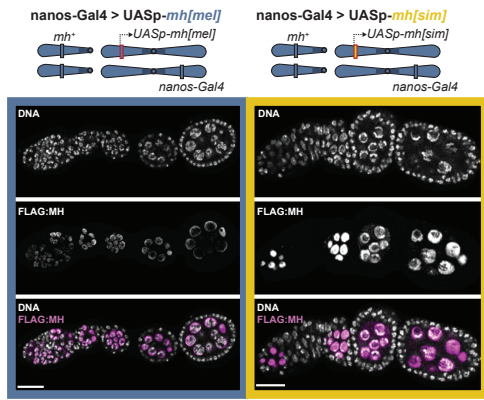**B**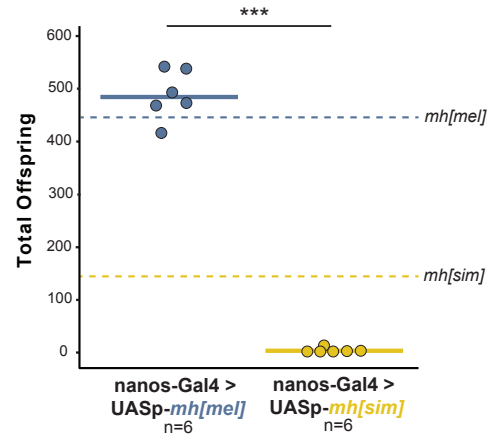**C**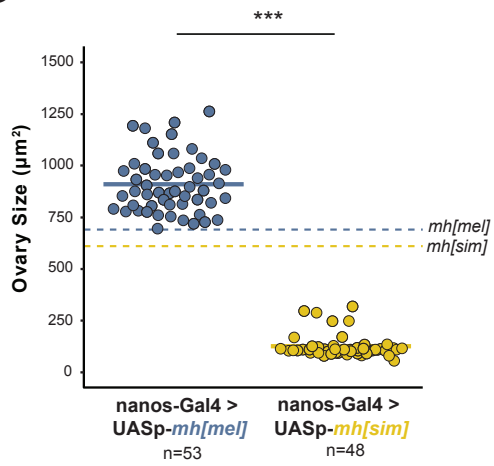**D**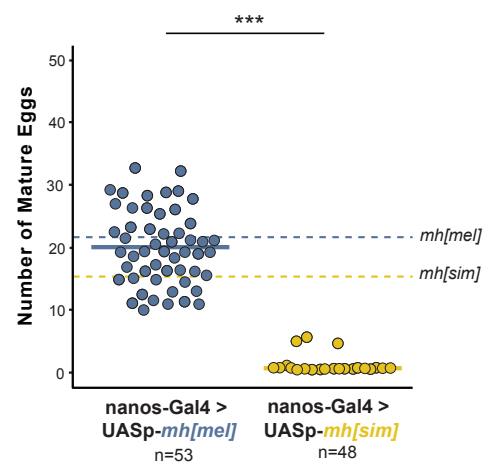**E**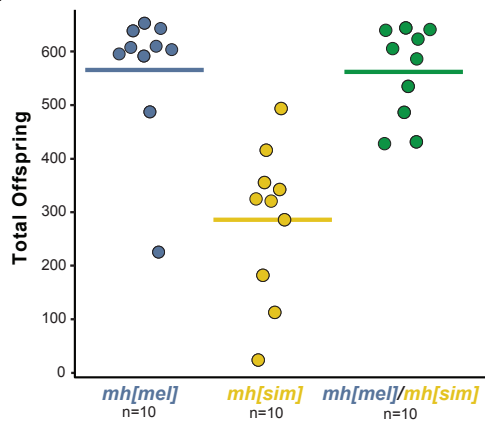

**Figure S2. MH[*sim*] toxicity is dose-dependent. Related to Figure 2.** (A) Anti-FLAG staining of *mh[mel]* and *mh[sim]* upon overexpression under the UAS-GAL4 system. The driver nos-GAL4-VP16 expresses the *mh* transgene in the germline only. Corresponding chromosome X (wildtype) and chromosome 3 are shown in the images above. Note that wildtype *mh* is present in these genotypes. (B) Progeny counts of the nos-Gal4-VP16-driven UASp-*mh[mel]* or UASp-*mh[sim]* females crossed to wildtype ( $w^{1118}$ ) males. (C) Ovary size estimates of the nos-Gal4-VP16-driven UASp-*mh[mel]* or UASp-*mh[sim]* females. (D) Number of mature eggs per ovary pair from nos-Gal4-VP16-driven UASp-*mh[mel]* or UASp-*mh[sim]* females. (E) Total offspring of *mh[mel]*, *mh[sim]*, and *mh[mel]/mh[sim]* heterozygous females crossed to wildtype ( $w^{1118}$ ) males. In panels B, C, and D, dotted lines correspond to *mh[mel]* and *mh[sim]* averages reported in Figure 1C, 1E, and 1F, respectively. (*t*-test: “\*\*\*\*” =  $p < 0.001$ , scale bar = 25 $\mu$ m)

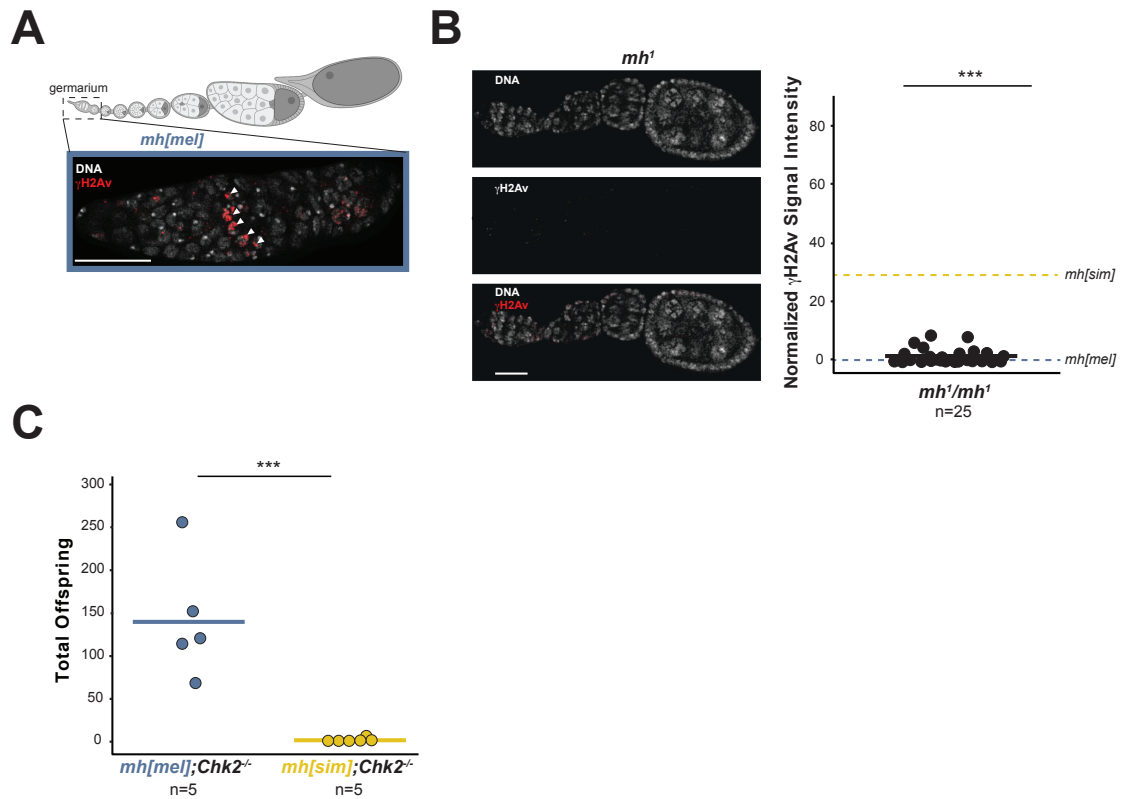

**Figure S3. DNA damage signaling further distinguishes MH[sim] from *mh* null. Related to Figure 2.** (A) *Drosophila* ovariole (above) showing the germarium where meiotic recombination occurs. Germarium of an *mh[mel]* female (below) showing programmed double-strand breaks (arrowheads) occurring in “region 2A” of the germarium detected under higher laser power relative to images displayed in Figure 2D. These double-strand breaks are repaired via meiotic recombination pathways. (B)  $\gamma$ H2Av signal in *mh<sup>1</sup>* ovaries and quantification of normalized fluorescent signal intensity. (C) Progeny counts from *mh[mel]; Chk2<sup>-/-</sup>* and *mh[sim]; Chk2<sup>-/-</sup>* females crossed to wildtype (*w<sup>1118</sup>*) males. Note that *mh[mel]; Chk2<sup>-/-</sup>* reduced progeny counts are due to the *Chk2<sup>-/-</sup>* mutation.<sup>S1</sup> In panel B, dotted lines correspond to *mh[mel]* and *mh[sim]* averages reported in Figure 2D. (*t*-test: “\*\*\*\*” =  $p < 0.001$ , scale bar = 25 $\mu$ m)

**A**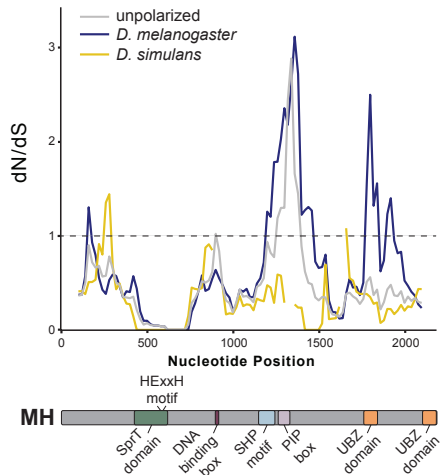**B**

|         | Poly-morphism | Fixation |
|---------|---------------|----------|
| Syn     | 50            | 112      |
| Non-syn | 8             | 56       |

**Figure S4. Lineage-specific MH adaptive evolution and Top2 adaptive evolution. Related to Figure 1 and Figure 4.** (A) A 200bp sliding window of dN/dS across the *mh* coding region. dN/dS estimates from a comparison of *D. melanogaster* and *D. simulans* are in grey. dN/dS estimates from a comparison of *D. melanogaster* and the *D. melanogaster*-*D. simulans* reconstructed ancestor are in blue. dN/dS estimates from a comparison of *D. simulans* and the *D. melanogaster*-*D. simulans* reconstructed ancestor are in yellow. Windows without synonymous sites are represented as gaps. Windows of dN/dS > 1 are significantly enriched in the *D. melanogaster* lineage (Table S2). (B) Counts of synonymous and nonsynonymous polymorphic and fixed sites within and between *D. melanogaster* and *D. simulans*;  $\chi^2$  test,  $p = 0.004$ .

|                       |                                | <b>Polymorphism</b> | <b>Fixation</b> |
|-----------------------|--------------------------------|---------------------|-----------------|
| <b>Synonymous</b>     | <i>D. melanogaster</i> lineage | 4                   | 36              |
|                       | <i>D. simulans</i> lineage     | 12                  | 17              |
|                       | Unpolarized                    | 21                  | 65              |
| <b>Non-Synonymous</b> | <i>D. melanogaster</i> lineage | 4                   | 48              |
|                       | <i>D. simulans</i> lineage     | 8                   | 20              |
|                       | Unpolarized                    | 12                  | 83              |

**Table S1. Counts of unpolarized and polarized synonymous and non-synonymous polymorphic and fixed sites in the *mh* coding sequence. Related to Figure 1.** Unpolarized MK-test:  $\chi^2$ ,  $p = 0.04$ . *D. melanogaster* lineage MK-test:  $\chi^2$ ,  $p = 0.70$ . *D. simulans* lineage MK-test:  $\chi^2$ ,  $p = 0.31$ .

|                                                | dN/dS windows < 1 | dN/dS windows > 1 |
|------------------------------------------------|-------------------|-------------------|
| <i>D. melanogaster mh</i> – ancestor <i>mh</i> | 80                | 21*               |
| <i>D. simulans mh</i> – ancestor <i>mh</i>     | 93                | 3                 |

**Table S2. Lineage-specific dN/dS analysis of *mh* in 200bp windows. Related to Figure 1 and Figure S4.** \*Windows with dN/dS >1 are enriched along the *D. melanogaster* lineage (Fisher's Exact Test,  $p = 0.0001$ )

| Forward                                      | Reverse                       | Purpose                                                                                                                    |
|----------------------------------------------|-------------------------------|----------------------------------------------------------------------------------------------------------------------------|
| GATCCAGGAAATACTCGGCC<br>ATCCTGGCCAACAGTGACTC | CCAAAGACTGGTCACACTGC          | Primers used to amplify the <i>mh</i> ortholog in <i>D. simulans</i>                                                       |
|                                              | TTTGCCCAAAATATCGAACG          | Sequencing primer for <i>mh</i> ortholog in <i>D. simulans</i>                                                             |
| GCAGAGCAGACGAGTCAGTG                         |                               | Sequencing primer for <i>mh</i> ortholog in <i>D. simulans</i>                                                             |
|                                              | TTGACCTTGTGTGAGGACGA          | Sequencing primer for <i>mh</i> ortholog in <i>D. simulans</i>                                                             |
| ACGACGCCTCTTTTTGGTAA                         |                               | Sequencing primer for <i>mh</i> ortholog in <i>D. simulans</i>                                                             |
|                                              | ACATACGCAACTGGTTCGAC          | Sequencing primer for <i>mh</i> ortholog in <i>D. simulans</i>                                                             |
| CACCTTGTTGATCGTCTCCA                         |                               | Sequencing primer for <i>mh</i> ortholog in <i>D. simulans</i>                                                             |
|                                              | GATCCCACTCCGGACATCTA          | Sequencing primer for <i>mh</i> ortholog in <i>D. simulans</i>                                                             |
| TTCTCCATTTTTGTCTTGTGGA                       |                               | Sequencing primer for <i>mh</i> ortholog in <i>D. simulans</i>                                                             |
| AAGTGTCGCGCTATTTCAACC                        | TCACCGTCATGGTCTTTGTAGTCCAT    | Reverse primer anneals in FLAG-tag. Amplifies <i>mh[mel]</i> and <i>mh[sim]</i> CRISPR-introduced transgenes               |
| AATGGATTTTCGGCAAATGAG                        | GTCGTTGTAGGAGCCCATGT          | Primers anneal outside homology arms. Amplicon spans entire <i>mh[mel]</i> and <i>mh[sim]</i> CRISPR-introduced transgenes |
| ATGCGCAGGCTAAATTCGAT                         |                               | Sequencing primer for <i>mh[mel]</i> and <i>mh[sim]</i> region                                                             |
| GATTACCTGTTCGCCCTGAA                         |                               | Sequencing primer for <i>mh[mel]</i> and <i>mh[sim]</i> region                                                             |
| ACCAACATCACCGTGTACCA                         |                               | Sequencing primer for <i>mh[mel]</i> and <i>mh[sim]</i> region                                                             |
| CATTGAGCACATCGACCTGT                         |                               | Sequencing primer for <i>mh[mel]</i> region                                                                                |
| CATCGAGAACATCGATATCT                         |                               | Sequencing primer for <i>mh[sim]</i> region                                                                                |
| CTCCCTGACCAGCAAGGAT                          |                               | Sequencing primer for <i>mh[mel]</i> region                                                                                |
| CAGCTTCACCTCCAAGGAT                          |                               | Sequencing primer for <i>mh[sim]</i> region                                                                                |
| TCACGAATTCCGCCCTCT                           |                               | Sequencing primer for <i>mh[mel]</i> and <i>mh[sim]</i> region                                                             |
| GGCCCTGCTCATATCGTATC                         | AAGAACCTTACTGCGTGCAAC         | Primers anneal in <i>mh</i> introns. Amplifies endogenous <i>mh</i> gene in <i>D. melanogaster</i> .                       |
| TATTCTTACATCTATGTGACC                        | GTTTTGAGCAGCTAATTACC          | Primers amplify a repeat unit of the 359-bp satellite array <sup>S2</sup>                                                  |
|                                              | CAGGTTTCAGGGCGAACAGGTAATCGGCG | Nested gene specific primer A used for genome walking                                                                      |
|                                              | TGATGAACCACCCTTGTATCGTCATCC   | Nested gene specific primer B used for genome walking                                                                      |
|                                              | TCACCGTCATGGTCTTTGTAGTCCAT    | Nested gene specific primer C used for genome walking                                                                      |
| TGGGTACAGTGCGCATTTCAT                        | CGAGCAAGTCCGCAAAAAGT          | Primers used to amplify the <i>Top2</i> ortholog in <i>D. simulans</i>                                                     |
| CAGCTTAAGCACAGCGACAC                         |                               | Sequencing primer for <i>Top2</i> ortholog in <i>D. simulans</i>                                                           |
| CCAGCTTCACCGTTGAGACT                         |                               | Sequencing primer for <i>Top2</i> ortholog in <i>D. simulans</i>                                                           |
| TAGCTACCTACAAGGGCGGT                         |                               | Sequencing primer for <i>Top2</i> ortholog in <i>D. simulans</i>                                                           |
| AGGGAGACTCAGCCAAGTCA                         |                               | Sequencing primer for <i>Top2</i> ortholog in <i>D. simulans</i>                                                           |
| TTTTCAAGACATGCAGCGCC                         |                               | Sequencing primer for <i>Top2</i> ortholog in <i>D. simulans</i>                                                           |
| GCCAGCGCTCGTTACATTTT                         |                               | Sequencing primer for <i>Top2</i> ortholog in <i>D. simulans</i>                                                           |
| CCACCGTTCGCTTTGTGATC                         |                               | Sequencing primer for <i>Top2</i> ortholog in <i>D. simulans</i>                                                           |
| CGATCCGAAAAGGCCTTTA                          |                               | Sequencing primer for <i>Top2</i> ortholog in <i>D. simulans</i>                                                           |
| AAGCAGATCCTGATGCCAGC                         |                               | Sequencing primer for <i>Top2</i> ortholog in <i>D. simulans</i>                                                           |

**Table S3. Primers used in this study. Related to STAR Methods.**



## **SUPPLEMENTAL REFERENCES**

S1. Xu, J., and Du, W. (2003). *Drosophila* chk2 plays an important role in a mitotic checkpoint in syncytial embryos. *FEBS Lett* 545, 209-212. [10.1016/s0014-5793\(03\)00536-2](https://doi.org/10.1016/s0014-5793(03)00536-2).

S2. Rosic, S., Kohler, F., and Erhardt, S. (2014). Repetitive centromeric satellite RNA is essential for kinetochore formation and cell division. *J Cell Biol* 207, 335-349. [10.1083/jcb.201404097](https://doi.org/10.1083/jcb.201404097).
